# Supplementary material
Source: PubMed Central journal article supplement (PMC4962642)
Supplement: IAI.00360-16_zii999091779so1.pdf [file IAI.00360-16_zii999091779so1.pdf]

**Table S1:** Oligonucleotide primers used in the study.

| Purpose                                                                      | Sequence (5' to 3')               |
|------------------------------------------------------------------------------|-----------------------------------|
| Forward primer for <i>B. burgdorferi flaB</i> quantitative RT-PCR (qRT-PCR). | TTGCTGATCAAGCTCAATATAACCA         |
| Reverse primer for <i>B. burgdorferi flaB</i> qRT-PCR.                       | TTGAGACCCTGAAAGTGATGC             |
| Forward primer for mouse $\beta$ -actin qRT-PCR.                             | AGAGGGAAATCGTGCGTGAC              |
| Reverse primer for mouse $\beta$ -actin qRT-PCR.                             | CAATAGTGATGACCTGGCCGT             |
| Forward primer for amplifying the <i>bb0104</i> upstream fragment            | GGCGAGCTCATTGGTGCAATACTCAACAGGAA  |
| Reverse primer for amplifying the <i>bb0104</i> upstream fragment            | GGCACGCGTTAAATTTTAGTTTTGGGTTAAGAG |
| Forward primer for amplifying the <i>bb0104</i> downstream fragment          | GGCCCGCGGTTTTATAACCTCCACATAATTAC  |
| Reverse primer for amplifying the <i>bb0104</i> downstream fragment          | GGCCTGCAGTAAATTATGCAAATTCTAAGTATG |
| Primer P3 used in Fig. 2                                                     | GGGGGAAGCGAAAGAGAAGATGA           |
| Primer P4 used in Fig. 2                                                     | TAATAAGATAATAAATTATTATT           |
| Primer P1 used in Fig. 2                                                     | CTAAAATGTAATTTTAAAAGAATCGT        |
| Primer P2 used in Fig. 2                                                     | GTGGAAAAAAGTTTTTTTCTGGATTT        |
| Primer P5 used in Fig. 2                                                     | TTCGGAGACGTAGCCACCTA              |
| Primer P6 used in Fig. 2                                                     | CAACAACCGCTTCTTGGTCG              |
| Primer PRXW008 (bb0104-F-NdeI) used in Fig. 2                                | GCTCATATGGTGGAAAAAAGTTTTTTTCTGAT  |
| Primer PRXW009(bb0104-R-BglII) used in Fig. 2                                | GAAGATCTAAAATGTAATTTTAAAAGAATCG   |
| Forward primer for <i>bb0323</i> RT-PCR.                                     | ATATGGATCCCGCTGGAAT               |
| Reverse primer for <i>bb0323</i> RT-PCR.                                     | AGCCGCTTCAAGTGCTTTTA              |

**Table S2:** Isolation of viable *B. burgdorferi* by culture analysis of tissues from infected murine hosts (WT, wild type; M1 and M2, two independent clones of *htrA\_Bb* mutants)

|    | 1 <sup>st</sup> week    | 2 <sup>nd</sup> week    | 3 <sup>rd</sup> week    | 4 <sup>th</sup> week    |
|----|-------------------------|-------------------------|-------------------------|-------------------------|
| WT | 3/3 heart<br>2/3 spleen | 3/3 heart<br>2/3 spleen | 3/3 heart<br>2/3 spleen | 3/3 heart<br>2/3 spleen |
| M1 | 0/3 heart<br>0/3 spleen | 0/3 heart<br>0/3 spleen | 0/3 heart<br>0/3 spleen | 0/3 heart<br>0/3 spleen |
| M2 | 0/3 heart<br>0/3 spleen | 0/3 heart<br>0/3 spleen | 0/3 heart<br>0/3 spleen | 0/3 heart<br>0/3 spleen |
